# Supplementary material for: Rapid conjugation of nanoparticles, proteins and siRNAs to microbubbles by strain-promoted click chemistry for ultrasound imaging and drug delivery
Source: Royal Society of Chemistry journal article supplement (doi:10.1039/c8py01721b), 2018-12-27
Supplement: c8py01721b1.pdf [file c8py01721b1.pdf]

# Supporting Information

## Rapid conjugation of nanoparticles, proteins and siRNAs to microbubbles by strain-promoted click chemistry for ultrasound imaging and drug delivery

Xifeng Liu,<sup>a,b</sup> Ping Gong,<sup>c</sup> Pengfei Song,<sup>c</sup> Feng Xie,<sup>d</sup> A. Lee Miller II,<sup>b</sup> Shigao Chen,<sup>c</sup> Lichun Lu<sup>\*,a,b</sup>

<sup>a</sup> Department of Physiology and Biomedical Engineering, Mayo Clinic, Rochester, Minnesota 55905, USA. \* E-mail: Lu.Lichun@mayo.edu

<sup>b</sup> Department of Orthopedic Surgery, Mayo Clinic, Rochester, Minnesota 55905, USA.

<sup>c</sup> Department of Radiology, Mayo Clinic, Rochester, Minnesota 55905, USA.

<sup>d</sup> Division of Cardiovascular Medicine, Nebraska Medical Center, Omaha, Nebraska 68198, USA.

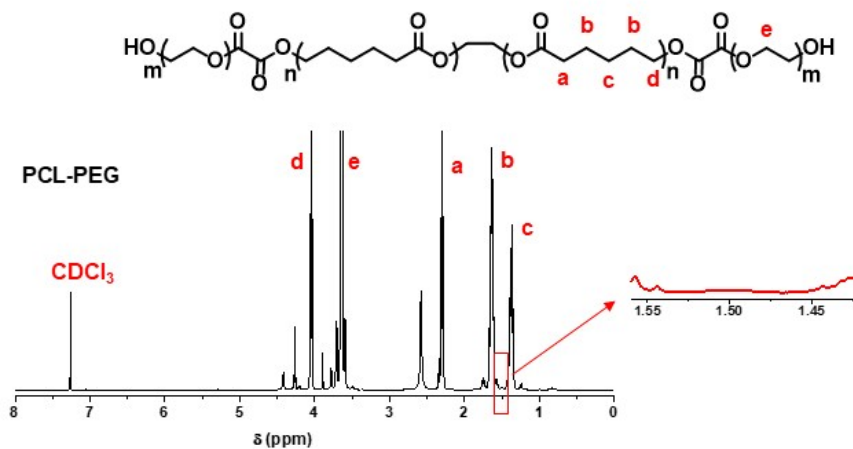

**Fig. S1** The <sup>1</sup>H NMR spectrum of PCL-PEG-OH (in CDCl<sub>3</sub>).

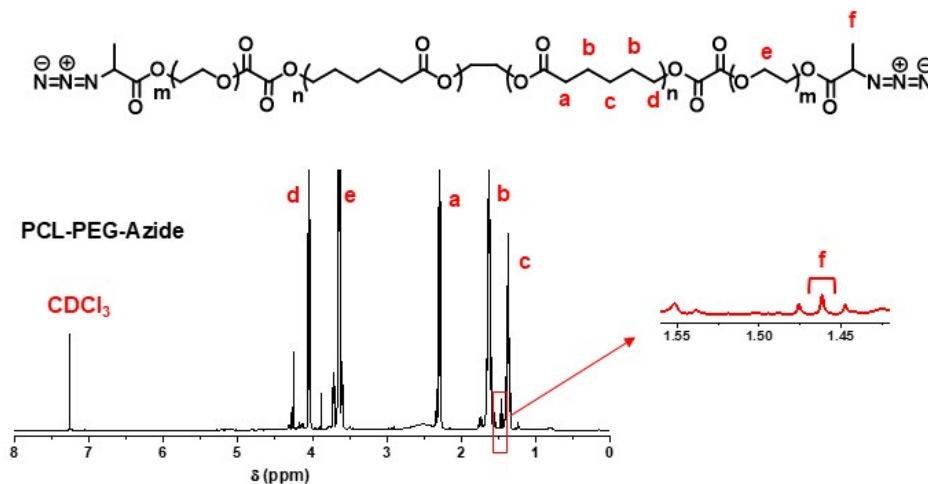

**Fig. S2** The  $^1\text{H}$  NMR spectrum of PCL-PEG- $\text{N}_3$  (in  $\text{CDCl}_3$ ).

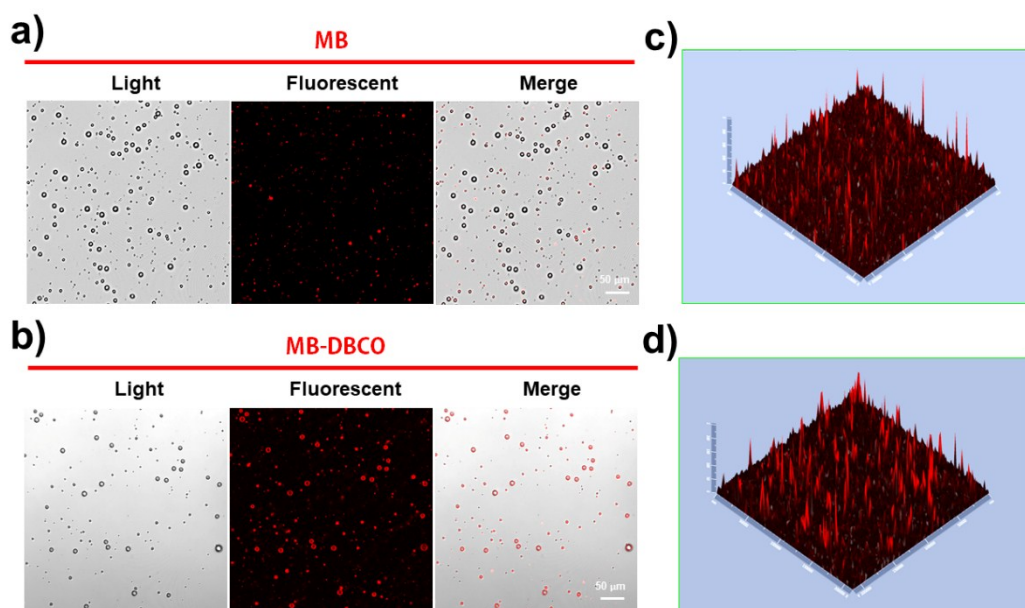

**Fig. S3** Confocal fluorescence microscopy images of a) pure HSA MBs and b) DBCO-MBs after ligation with azide modified DOX-NP-azide nanoparticles. Fluorescent intensity mapping of c) pure HSA MBs and d) DBCO-MB after ligation with DOX-encapsulated nanoparticles.

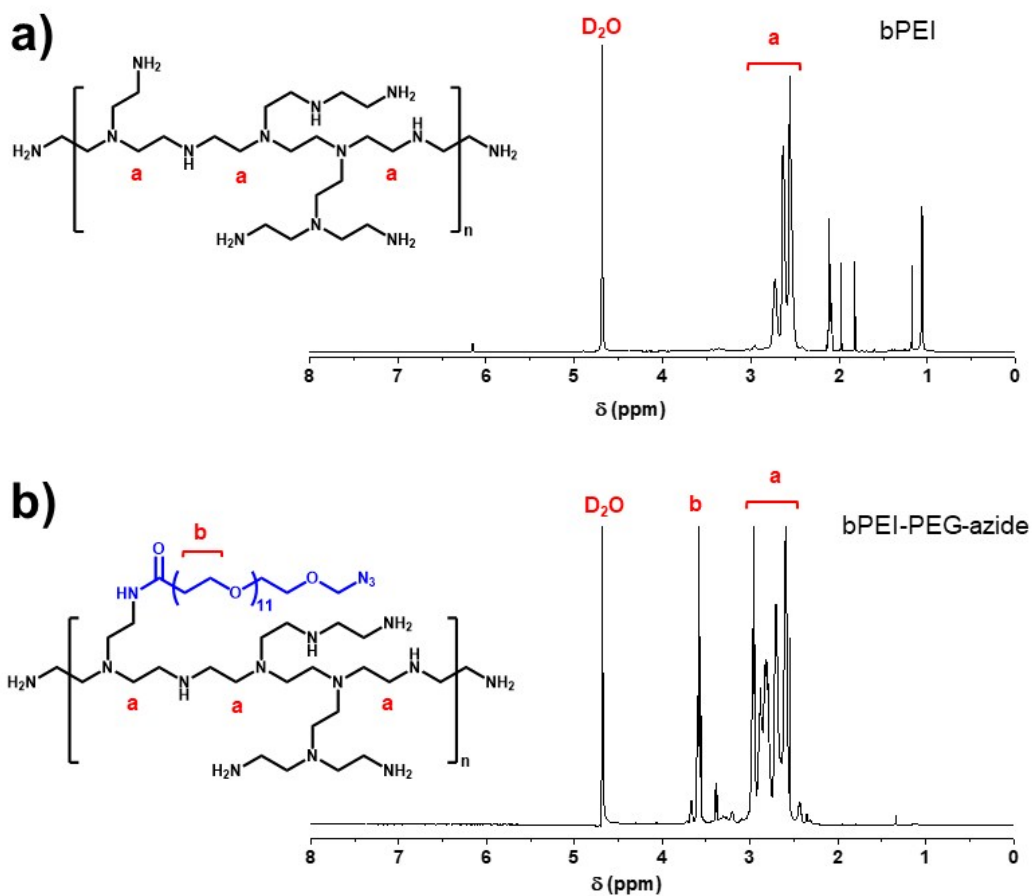

**Fig. S4** The  $^1\text{H}$  NMR spectra of a) bPEI (in  $\text{D}_2\text{O}$ ) and b) bPEI-azide (in  $\text{D}_2\text{O}$ ).

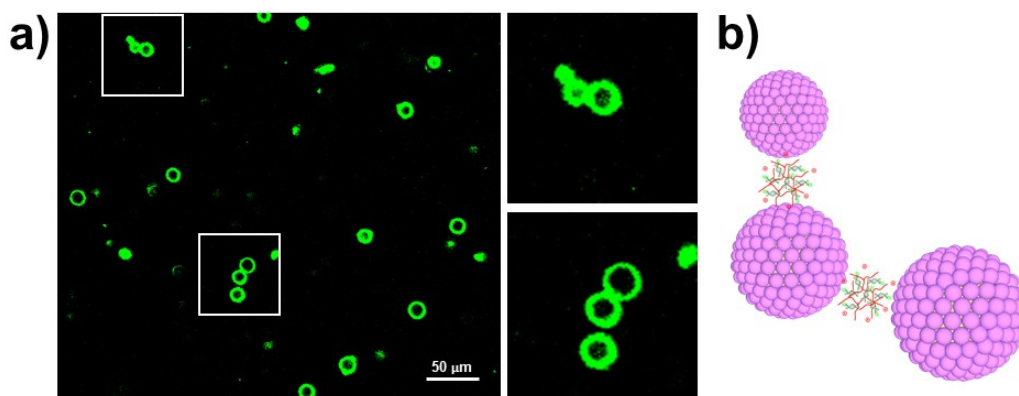

**Fig. S5** a) Confocal fluorescence microscopy images of pure HSA MBs after incubation with siRNA-bPEI-azide micelles not blocked with albumin protein. b) Schematic demonstration of static electrical forces causing strong conjugation of microbubbles.
